1 U.S. STATE-LEVEL COVID-19 TRANSMISSION INSIGHTS FROM A  
2 MECHANISTIC MOBILITY-INCIDENCE MODEL

3 EDWARD W. THOMMES<sup>1,2,3</sup>

4 ZAHRA MOHAMMADI<sup>2</sup>

5 DARREN FLYNN-PRIMROSE<sup>2,4</sup>

6 SARAH SMOOK<sup>2</sup>

7 GABRIELA GOMEZ<sup>1,5</sup>

8 SANDRA S. CHAVES<sup>1</sup>

9 LAURENT COUDEVILLE<sup>1</sup>

10 ROBERTUS VAN AALST<sup>1,6,7</sup>

11 CEDRIC MAHÉ<sup>1</sup>

12 MONICA G. COJOCARU<sup>2</sup>

13 <sup>1</sup>*Sanofi*

14 <sup>2</sup>*University of Guelph, Guelph, Ontario, Canada*

15 <sup>3</sup>*York University, Toronto, Ontario, Canada*

16 <sup>4</sup>*McMaster University, Hamilton, Ontario, Canada*

17 <sup>5</sup>*London School of Hygiene and Tropical Medicine, London, U.K.*

---

*Date:* March 2022.

18 <sup>6</sup>*Brown University School of Public Health, Providence, Rhode Island, USA*

19 <sup>7</sup>*University of Groningen, Groningen, Netherlands*

20 SUMMARY

21 **Background.** Throughout the COVID-19 pandemic, human mobility has played a central  
22 role in shaping disease transmission. In this study, we develop a mechanistic model to  
23 calculate disease incidence from commercially-available US mobility data over the course of  
24 2020. We use it to study, at the US state level, the lag between infection and case report. We  
25 examine the evolution of per-contact transmission probability, and its dependence on mean  
26 air temperature. Finally, we evaluate the potential of the model to produce short-term  
27 incidence forecasts from mobility data.

28 **Methods.** We develop a mechanistic model that relates COVID-19 incidence to time series  
29 contact index (CCI) data collected by mobility data vendor Cuebiq. From this, we perform  
30 maximum-likelihood estimates of the transmission probability per CCI event. Finally, we  
31 retrospectively conduct forecasts from multiple dates in 2020 forward.

32 **Findings.** Across US states, we find a median lag of 19 days between transmission and  
33 case report. We find that the median transmission probability from May onward was about  
34 20% lower than it was during March and April. We find a moderate, statistically significant  
35 negative correlation between mean state temperature and transmission probability,  $r = -.57$ ,  
36  $N = 49$ ,  $p = 2 \times 10^{-5}$ . We conclude that for short-range forecasting, CCI data would likely  
37 have performed best overall during the first few months of the pandemic.

38 **Interpretation.** Our results are consistent with associations between colder temperatures  
39 and stronger COVID-19 burden reported in previous studies, and suggest that changes in the  
40 per-contact transmission probability play an important role. Our model displays good po-  
41 tential as a short-range (2 to 3 week) forecasting tool during the early stages of a future pan-  
42 demic, before non-pharmaceutical interventions (NPIs) that modify per-contact transmission  
43 probability, principally face masks, come into widespread use. Hence, future development  
44 should also incorporate time series data of NPI use.

45 1. INTRODUCTION

46 As of end of early June 2022, the global COVID-19 pandemic has produced 530M recorded  
47 cases and 6.3M recorded deaths worldwide<sup>1</sup>. Throughout its course, the complex epidemi-  
48 ology of the disease has been shaped, above all, by the changes in human behavior it has  
49 elicited. Indeed, in a counterfactual world that took no measures against it, the course of  
50 the pandemic would have been simple and catastrophic; it is estimated [1]<sup>2</sup> that about 90%  
51 of the world's population would have been infected in a single massive wave lasting roughly  
52 two months, with a death toll of about 40 million.

<sup>1</sup><https://covid19.who.int/>

<sup>2</sup>The original report published by the Collaborating Centre for Infectious Disease Modelling and collaborators: <https://www.imperial.ac.uk/mrc-global-infectious-disease-analysis/covid-19/report-12-global-impact-covid-19/>

53 The most immediate response consisted of the near-universal lock-downs which began in  
54 rapid succession around the world in spring of 2020. The publication of freely-available  
55 worldwide human mobility data by Google<sup>3</sup>, Apple<sup>4</sup> and Facebook<sup>5</sup>, and the re-purposing of  
56 business intelligence mobility data from vendors such as Cuebiq<sup>6</sup> and Safegraph<sup>7</sup>, has made  
57 it possible to trace changes in mobility with high spatial and temporal resolution, and to  
58 directly observe the results of mobility-related measures enacted to counter disease trans-  
59 mission. Numerous studies have examined the connection between mobility and COVID-19  
60 epidemiology. Some use statistical models to characterize associations between measures of  
61 mobility and measures of disease burden (e.g. [2], [3], [4], [5]). Others use hybrid approaches  
62 that combine statistical and mechanistic models (e.g. [6] [7] [8]), in some cases with the help  
63 of artificial intelligence (e.g. [9]). Many further examples are given in the systematic review  
64 of Zhang et al.[10].

65 Our approach here is almost entirely mechanistic. Changes in human mobility affect  
66 disease transmission by modifying the rate of person-to-person contacts. Most available  
67 mobility data is in the form of indices that are indirect proxies for contact rate, and which  
68 require additional work (e.g. [11]) to infer contact rate itself. Here, we use data from US  
69 mobility data provider Cuebiq, which probes person-to-person contact rate more directly  
70 (see Section 3), thus lending itself better to use in a mechanistic model. This allows us to  
71 estimate, within a proportionality constant, the per-contact transmission probability of the  
72 disease. We restrict our analysis to 2020 in order to avoid complication due to i) emergence  
73 of new variants, ii) vaccination and iii) significant accumulation of post-infection natural  
74 immunity in the population.

75 In 2020, prior to the availability of COVID vaccines, the evolution of per-contact trans-  
76 mission probability over time within a given region reflected the time-varying practice of  
77 non-pharmaceutical interventions (NPIs), notably mask-wearing and short-range social dis-  
78 tancing (i.e. maintaining a minimum separation of e.g. 6ft among people). Note that the  
79 latter is technically encompassed within the contact rate, however the mobility data we use  
80 does not have a high enough spatial resolution to discern the degree to which distancing on  
81 the scale of a few meters is practiced.

82 An association of colder temperatures/climates with different measures of COVID-19 bur-  
83 den has been reported in multiple studies (see [12] for a 2020 systematic review; more recent  
84 studies include [13], [14] and [15]). Using our model results, we compare the transmission  
85 probability across US states during spring of 2020, at the onset of the pandemic.

86 Finally, we take an exploratory look at the potential of Cuebiq mobility data for short-term  
87 forecasting.

## 88 2. METHODS

89 In this section we provide an overview of our model; the full derivation is given in Appendix  
90 A.

91 We assume that the disease dynamics are adequately described by a Susceptible-Infected-  
92 Recovered (SIR) compartmental model [16] of a homogeneously mixed population. The

---

<sup>3</sup><https://www.google.com/covid19/mobility/>

<sup>4</sup><https://covid19.apple.com/mobility>

<sup>5</sup><https://dataforgood.facebook.com/dfg/covid-19>

<sup>6</sup><https://www.cuebiq.com/>

<sup>7</sup><https://www.safegraph.com/>

93 equation for the rate of change of disease prevalence is then

$$\frac{dI}{dt} = \frac{\beta(t)S(t)I(t)}{N} - \gamma I(t), \quad (1)$$

94 where  $\beta(t)$  is the (time-dependent) rate of effective contacts,  $\gamma$  is the recovery rate from the  
95 infectious state, and  $N$  is the size of the total population. Effective contacts are ones which  
96 would transmit disease if they involved an infectious person. As long as a small enough  
97 proportion of the population has been infected that  $S/N \approx 1$ —as was the case in 2020 for  
98 COVID throughout the US—the SIR model solution for the prevalence is

$$I(t) = I_0 e^{(\beta(t)-\gamma)t}, \quad (2)$$

99 see e.g. [17]. The incidence, i.e. the rate of new cases, is given by the first term on the  
100 right-hand side of Equation 1 alone. Substituting, we obtain

$$inc(t) = inc_0 \left( \frac{\beta(t)}{\beta_0} \right) e^{(\beta(t)-\gamma)t} \quad (3)$$

101 Furthermore, can decompose  $\beta(t)$  into

$$\beta(t) = P_{trans}(t) \cdot cr(t), \quad (4)$$

102 where  $cr(t)$  is the contact rate, while  $P_{trans}(t)$  is the transmission probability per contact.

103 Suppose we have time series data of incidence,  $inc_0, inc_1, \dots, inc_n$ , and contact rate,  $cr_0, cr_1, \dots, cr_n$   
104 at evenly-spaced times  $t_0, t_1, \dots, t_n$ . Suppose further that this time interval is sufficiently short  
105 that we can consider  $P_{trans}$  to be approximately constant throughout. With some more ma-  
106 nipulation (see Appendix A), we obtain an expression for the incidence at time  $t_n$  in terms  
107 of the contacts occurring between times  $t_0$  and  $t_n$ :

$$(\ln inc_n - \ln inc_0) = (\ln cr_n - \ln cr_0) + P_{trans} \sum_{i=1}^n cr_i - \gamma(t_n - t_0) \quad (5)$$

108 In reality, reporting delays and the incubation and latent periods of the disease will together  
109 impose a distribution of delays between the time that transmission occurs and the time that  
110 the resulting cases are captured by surveillance. We can account for this by replacing the  
111 time series of  $cr_i$  with an appropriately lagged version (see Appendix A).

112

### 3. DATA

113 For incidence, we use the US COVID-19 surveillance data compiled by the New York  
114 Times, available at <https://github.com/nytimes/covid-19-data>, aggregated at the state  
115 level.

116 We obtain contact data from Cuebiq, a vendor of US mobility data sourced from mobile  
117 phone users who have opted into sharing location data through a California Consumer Pri-  
118 vacy Act (CCPA) compliant process, hereafter referred to as Cuebiq users. Several previous  
119 studies have assessed the representativeness of the data by calculating the correlation be-  
120 tween the spatial distribution Cuebiq user home locations, and the spatial distribution of the  
121 population as captured by US Census data. The studies found high correlations at the cen-  
122 sus tract level in Washington State [18], the Boston metropolitan area [19] and Philadelphia  
123 [20], and U.S.-wide at the county level [21], with Pearson correlation coefficients of 0.91, 0.8,  
124 0.72 and 0.94, respectively.

125 We make use of the so-called Cuebiq contact index, hereafter CCI. The CCI is a 7-day  
126 rolling average of the daily number of encounters that a Cuebiq user has with other Cuebiq  
127 users in a given county. An encounter is registered for every instance of two devices occupying  
128 the same 50-foot geohash region within the same 5 minute interval; hereafter we refer to this  
129 as a CCI encounter. The CCI index is described in more detail on Cuebiq’s website<sup>8,9</sup>.

130 A CCI encounter thus amounts to a *contact opportunity* rather than an actual contact; in  
131 practice only a fraction  $f_{contact}$  of them will consist of two Cuebiq users encountering each  
132 other at a small enough separation to be meaningful for disease transmission (e.g. < 6 feet for  
133 COVID-19). At the same time, only a fraction of the population are Cuebiq users. We thus  
134 calculate (Equation B.2) an adjusted index,  $CCI_{100\%}$ , which is the estimated rate of Cuebiq  
135 encounters if the entire population were Cuebiq users, under the assumption (see above) that  
136 Cuebiq users constitute a representative sample of the population. The relationship between  
137 contact rate and CCI is then

$$cr = f_{contact}CCI_{100\%}, f_{contact} < 1, \quad (6)$$

138 and so we can write Equation 5 as

$$(\ln inc_n - \ln inc_0) = (\ln cr_n - \ln cr_0) + f_{contact}P_{trans} \sum_{i=1}^n CCI_{100\%_i} - \gamma(t_n - t_0) \quad (7)$$

139 Appendix B describes the details of how a time series of  $P_{CCI}$  is obtained for each state by  
140 fitting Equation 5 to COVID-19 case reports.

141

## 4. RESULTS

142 Using Equation 5, we first determine the best-fit lag between  $CCI_{100\%}$  and incidence for  
143 each state, as described in Appendix B. Figure 1 shows the time series of  $CCI_{100\%}$  B.2)  
144 together with its lagged version for four example states. Using this lag, we then perform  
145 maximum-likelihood fits of the scaled transmission probability ( $f_{contact}P_{trans}$ ) and initial  
146 incidence  $inc_0$  to observed incidence over successive 6-week intervals, again using Equation  
147 5. Results are shown in Figure 2, while Figure 3 shows the model-derived incidence using  
148 the maximum-likelihood values, together with the observed incidence. Fits for all 51 states  
149 are presented in the Supplementary Material.

150 Figure 4 shows the distributions across all states of ( $f_{contact}P_{trans}$ ) averaged over March and  
151 April 2020, ( $f_{contact}P_{trans}$ )<sub>early</sub>, together with the average across the rest of 2020, ( $f_{contact}P_{trans}$ )<sub>RoY</sub>.  
152 The former reflects a largely pre-mask measure of the transmission probability, while for the  
153 latter, transmission probability is modified by subsequent widespread yet heterogeneous  
154 adoption of masks across US. This figure also shows the distribution of best-fit mobility-  
155 transmission lags; the median is 19 days.

156 Figure 5 shows ( $f_{contact}P_{trans}$ )<sub>early</sub> versus mean spring temperature for the states (excluding  
157 the District of Columbia)<sup>10</sup> Computing the Pearson product-moment correlation coefficient of  
158 the two quantities, we find a moderate, statistically significant negative correlation,  $r = -.57$ ,  
159  $N = 49$ ,  $p = 2 \times 10^{-5}$ . That is, colder temperatures tended to be associated with higher  
160 transmission probabilities in the initial stage of the pandemic, before differences in mask  
161 adoption among the states obscured the picture.

<sup>8</sup><https://www.cuebiq.com/visitation-insights-contact-index/>

<sup>9</sup><https://help.cuebiq.com/hc/en-us/articles/360041285051-Mobility-Insights-Mobility-Index-CMI>

<sup>10</sup>Data taken from <https://www.currentresults.com/Weather/US/average-state-weather.php>

162 Figure 6 shows a simple demonstration of how the model developed here could be used  
163 for short-range forecasting, using Florida as an example. Additional examples are shown in  
164 the Supplementary Material. To perform a forecast starting from a given date  $T$  forward,  
165 we first fit our model to the previous six weeks,  $[T - 6w, T]$ , of incidence data and lagged  
166 CCI<sub>100%</sub> data to obtain a maximum-likelihood estimate of  $(f_{contact}P_{trans})$ . The best-fit lag  
167 between incidence and CCI is 15 days for Florida. This means that at time  $T$ , we still  
168 have lagged CCI data up to date  $T + 15d$ . Using this data, together with the estimate of  
169  $(f_{contact}P_{trans})$ , we are thus able to run the model 15 days into the future. We retrospectively  
170 perform forecasts from dates  $T_1 = 1$  April 2020,  $T_2 = 1$  June,  $T_3 = 1$  July and  $T_4 = 25$   
171 August, each date chosen to come just before a turnover in incidence from growth to decay  
172 or vice versa. The quality of each forecast can be visually assessed by comparing it to the  
173 actual incidence of cases reported over the forecast horizon.

174

## 5. DISCUSSION

175 Across the 51 states, the scaled transmission probability averaged over the first two months  
176 of the pandemic (March and April 2020),  $(f_{contact}P_{trans})_{early}$ , has a median value of 0.0039.  
177 The transmission probability across the rest of the year,  $(f_{contact}P_{trans})_{RoY}$ , has a median  
178 value of 0.0031, about 20% lower (Figure 4, top). A marked decrease in transmission prob-  
179 ability is consistent with the overall increasing level of NPI adoption, principally mask-  
180 wearing, as the year progressed. Seasonality may also play a role. However, looking at the  
181 individual state time series of  $(f_{contact}P_{trans})$  (see Figure 2 for four examples, and the Supple-  
182 mentary Material for the remaining 47 states) reveals significant heterogeneity, with some  
183 states (e.g. New Jersey, Florida) showing a clear reduction in  $P_{CCI}$  after spring of 2020,  
184 yet others (e.g. Alaska) showing no clear time trend. This may be reflective of the hetero-  
185 geneity in the practice of NPIs that reduce per-contact transmission probability, primarily  
186 the adoption level of masks and the level of compliance with social distancing (which, since  
187 it occurs on a scale of a few meters, is not resolved in Cuebiq’s mobility data). Given the  
188 evidence of temperature dependence in COVID transmissibility, it may also be reflective of  
189 heterogeneity in seasonal weather patterns among states.

190 Across all states, the median best-fit time lag between CCI<sub>100%</sub> and observed incidence  
191 is 19 days, though here, again, there is significant heterogeneity (Figure 4, bottom). The  
192 time between infection and case report is the sum of the incubation period of a disease,  
193 the diagnostic delay and the reporting delay. In the hypothetical case of instantaneous  
194 diagnosis and reporting, the delay would be due to the incubation period alone. Thus the  
195 smallest lag we observe, 11 days, constitutes an upper limit to the median incubation period.  
196 Meta-analyses have variously reported a mean COVID-19 incubation period of 6.5 (95% CI:  
197 5.9–7.1) days[22], 5.8 (95% CI: 5.0–6.7) days[23], 5.6 (95% CI: 5.2–6.0) days or 6.7 (95% CI:  
198 6.0–7.4) days[24], 5.74 (95% CI: 5.18–6.30) days[25], and 6.2 (95% CI 5.4, 7.0) days[26], all  
199 of which fall below 11 days. One source of variability may be heterogeneity in state-level  
200 reporting practices. Also, since the latent period is determined by in-host interaction, it may  
201 vary systematically by population characteristics (age distribution, comorbidity profile etc.),  
202 which may also contribute to the heterogeneity.

203 Multiple studies have reported associations between colder temperatures and various met-  
204 rics of COVID burden (see Introduction). Our results suggest, specifically, an association  
205 between temperature and per-contact transmission probability. Although prior studies have  
206 found evidence that the COVID-19 virus half-life is reduced at higher temperatures ([27],

207 [28], [29]), it is important to note that our results do not by themselves imply that this par-  
208 ticular mechanism is responsible. Behavior could also contribute: People in warmer climates  
209 tend to spend a larger proportion of their time outdoors, thus a larger proportion of daily  
210 contacts will occur outdoors in, for example, springtime California versus springtime Alaska.  
211 And there is strong evidence to suggest that the outdoor risk of COVID transmission is  
212 substantially lower than the indoor risk (see [30] for a systematic review). Both these causal  
213 pathways, and more, could be operating together.

214 In the forecasting demonstration shown in Figure 6, the sharp downturn in Florida in-  
215 cidence just after 1 April 2020 is reasonably well predicted, as is the return to incidence  
216 growth after 1 June. However, neither the downturn after 1 July nor the upturn beginning  
217 in late August are predicted. Indeed, Florida’s  $CCI_{100\%}$  (Figure 1) varies much less after the  
218 beginning of July than it does before. However, widespread mask mandates started coming  
219 into effect in Florida on 23 June; with a 15-day lag (i.e. 8 July) this is close to Florida’s  
220 second incidence peak. This suggests that at later time, variations in mask use, rather than  
221 in contact rate, may have played the dominant role in driving changes in transmission. We  
222 leave to future work a more sophisticated forecast model that incorporates mask use, where  
223 such data is available.

224 The work presented here is subject to a number of limitations: i) Both our model and the  
225 data we use lack any stratification, thus any effects arising from heterogeneous demography,  
226 health status etc. within a given state are not accounted for. ii) Though previous studies  
227 all found high correlation between the geographic distribution of Cuebiq users and that of  
228 the population as a whole, this does not fully guarantee the representativeness of Cuebiq  
229 users. iii) In comparing states to each other, we have made the assumption that the scaling  
230 (Equation B.1) between true contact rate and adjusted Cuebiq contact index is the same  
231 across all states. iv) We have assumed that within a given state, the lag between mobility  
232 and incidence, which we estimate using only the first four months of the pandemic, remains  
233 constant. v) We have argued that transmission probability changes more slowly over time  
234 than mobility, and thus approximated  $P_{trans}$  as constant within successive 6-week periods.  
235 However, this approximation may not always hold well, in particular when a change in  
236 mask mandates falls within a given period. Also, during the phase of gradual relaxation  
237 after the initial lock-downs, mask use may have increased at a similar rate to mobility as  
238 businesses, public spaces etc. re-opened while at the same time requiring masking. vi) In  
239 our forecasting experiment, we have unfairly granted ourselves fore-knowledge of the state’s  
240 mobility-incidence lag, which was actually fit using the first four months of data. In practice,  
241 in the very beginning of a pandemic we would have to resort to using a range of plausible  
242 lags, the lower bound being the mean incubation period of the disease.

243

## 6. CONCLUSION

244 Using a mobility index that can be considered a direct proxy of contact rate has allowed  
245 us to construct a fully mechanistic model that derives disease incidence from this data. As  
246 a result, we have been able to get direct insight into the variability of per-contact COVID-  
247 19 transmission in the U.S. both by state and by date. Our findings are consistent with  
248 associations between colder temperatures and stronger COVID-19 burden reported in pre-  
249 vious studies, and suggest that it is specifically changes in the per-contact transmission  
250 probability which play a role. As a forecast tool, the model would have performed best  
251 before NPIs that modified per-contact transmission probability—principally masks—came

252 into widespread use. To lift this limitation, future development should also incorporate time  
253 series data of NPI use. Our methodology is also readily extensible to other respiratory dis-  
254 eases such as influenza or RSV, contingent on the availability of good-quality surveillance  
255 data. Indeed, in a non-pandemic setting forecasting will be aided by the (likely) absence of  
256 NPIs, and by mobility following more predictable seasonal patterns rather than being driven  
257 by reaction to epidemiology. The availability of mobility data that even more directly probes  
258 person-to-person contacts, e.g. through Bluetooth proximity detection of the sort used in  
259 COVID exposure-notification apps, would also benefit the performance of this model.

260

#### CONTRIBUTORS

261 All authors were involved in the conception and design of the study. EWT, ZM and MGC  
262 developed the methodology, with input from all other authors. CM acquired the funding to  
263 purchase the commercial (Cuebiq) data used. EWT and MGC accessed, verified and collected  
264 the data. EWT, ZM and MGC contributed to the analysis, including the development of  
265 the software used therein. EWT wrote the original draft. All authors critically reviewed  
266 and edited the manuscript for scientific content. All authors have access to the data and  
267 software used, and are thus able to validate the analysis.

268

#### FUNDING

269 The mobility data used in this study was purchased by Sanofi.

270

#### DECLARATION OF INTERESTS

271 EWT, SSC, LC, RVA and CM are employees of Sanofi and may hold stock options. GG  
272 was an employee of Sanofi during part of the time over which this manuscript was prepared,  
273 and may hold stock options. MGC has received funding from Sanofi for an unrelated project.  
274 All other authors declare no conflicts of interest.

275

#### REFERENCES

- 276 [1] Walker PG, Whittaker C, Watson OJ, Baguelin M, Winskill P, Hamlet A, et al. The impact of  
277 COVID-19 and strategies for mitigation and suppression in low-and middle-income countries. *Science*.  
278 2020;369(6502):413-22.
- 279 [2] Basellini U, Alburez-Gutierrez D, Del Fava E, Perrotta D, Bonetti M, Camarda CG, et al. Linking excess  
280 mortality to mobility data during the first wave of COVID-19 in England and Wales. *SSM-Population*  
281 *Health*. 2021;14:100799.
- 282 [3] Kartal MT, Depren Ö, Depren SK. The relationship between mobility and COVID-19 pandemic: Daily  
283 evidence from an emerging country by causality analysis. *Transportation Research Interdisciplinary*  
284 *Perspectives*. 2021;10:100366.
- 285 [4] Ilin C, Annan-Phan S, Tai XH, Mehra S, Hsiang S, Blumenstock JE. Public mobility data enables  
286 covid-19 forecasting and management at local and global scales. *Scientific reports*. 2021;11(1):1-11.
- 287 [5] Sadowski A, Galar Z, Walasek R, Zimon G, Engelseth P. Big data insight on global mobility during the  
288 Covid-19 pandemic lockdown. *Journal of big Data*. 2021;8(1):1-33.
- 289 [6] Cot C, Cacciapaglia G, Sannino F. Mining Google and Apple mobility data: temporal anatomy for  
290 COVID-19 social distancing. *Scientific reports*. 2021;11(1):1-8.
- 291 [7] Chang S, Pierson E, Koh PW, Gerardin J, Redbird B, Grusky D, et al. Mobility network models of  
292 COVID-19 explain inequities and inform reopening. *Nature*. 2021;589(7840):82-7.
- 293 [8] Liu M, Thomadsen R, Yao S. Forecasting the spread of COVID-19 under different reopening strategies.  
294 *Scientific reports*. 2020;10(1):1-8.

- 295 [9] Fritz C, Dorigatti E, Rügamer D. Combining graph neural networks and spatio-temporal disease models  
296 to improve the prediction of weekly COVID-19 cases in Germany. *Scientific Reports*. 2022;12(1):1-18.
- 297 [10] Zhang M, Wang S, Hu T, Fu X, Wang X, Hu Y, et al. Human mobility and COVID-19 transmission:  
298 A systematic review and future directions. *Annals of GIS*. 2022:1-14.
- 299 [11] Mohammadi Z, Cojocaru M, Thommes E. Human behaviour, NPI and mobility reduction effects on  
300 COVID-19 transmission in different regions of the world. *BMC Public Health*. 2022, submitted.
- 301 [12] Mecenas P, Bastos RTdRM, Vallinoto ACR, Normando D. Effects of temperature and humidity on the  
302 spread of COVID-19: A systematic review. *PLoS one*. 2020;15(9):e0238339.
- 303 [13] Diao Y, Kodera S, Anzai D, Gomez-Tames J, Rashed EA, Hirata A. Influence of population density,  
304 temperature, and absolute humidity on spread and decay durations of COVID-19: a comparative study  
305 of scenarios in China, England, Germany, and Japan. *One Health*. 2021;12:100203.
- 306 [14] Loché Fernández-Ahúja JM, Fernández Martínez JL. Effects of climate variables on the COVID-19 out-  
307 break in Spain. *International Journal of Hygiene and Environmental Health*. 2021;234:113723. Available  
308 from: <https://www.sciencedirect.com/science/article/pii/S1438463921000389>.
- 309 [15] Smith TP, Flaxman S, Gallinat AS, Kinoshian SP, Stemkovski M, Unwin HJT, et al. Tempera-  
310 ture and population density influence SARS-CoV-2 transmission in the absence of nonpharmaceu-  
311 tical interventions. *Proceedings of the National Academy of Sciences*. 2021;118(25). Available from:  
312 <https://www.pnas.org/content/118/25/e2019284118>.
- 313 [16] Kermack WO, McKendrick AG. A contribution to the mathematical theory of epidemics. *Proceedings*  
314 *of the royal society of london Series A, Containing papers of a mathematical and physical character*.  
315 1927;115(772):700-21.
- 316 [17] Ma J. Estimating epidemic exponential growth rate and basic reproduction number. *Infectious Disease*  
317 *Modelling*. 2020;5:129-41.
- 318 [18] Wang F, Wang J, Cao J, Chen C, Ban XJ. Extracting trips from multi-sourced data for mobility  
319 pattern analysis: An app-based data example. *Transportation Research Part C: Emerging Technologies*.  
320 2019;105:183-202.
- 321 [19] Aleta A, Martin-Corral D, Pastore y Piontti A, Ajelli M, Litvinova M, Chinazzi M, et al. Modelling  
322 the impact of testing, contact tracing and household quarantine on second waves of COVID-19. *Nature*  
323 *Human Behaviour*. 2020;4(9):964-71.
- 324 [20] Nande A, Sheen J, Walters EL, Klein B, Chinazzi M, Gheorghe AH, et al. The effect of eviction moratoria  
325 on the transmission of SARS-CoV-2. *Nature communications*. 2021;12(1):1-13.
- 326 [21] Deng H, Du J, Gao J, Wang Q. Network percolation reveals adaptive bridges of the mobility network  
327 response to COVID-19. *PloS one*. 2021;16(11):e0258868.
- 328 [22] Alene M, Yismaw L, Assemie MA, Ketema DB, Gietaneh W, Birhan TY. Serial interval and incubation  
329 period of COVID-19: a systematic review and meta-analysis. *BMC Infectious Diseases*. 2021;21(1):1-9.
- 330 [23] McAloon C, Collins Á, Hunt K, Barber A, Byrne AW, Butler F, et al. Incubation period of COVID-19:  
331 a rapid systematic review and meta-analysis of observational research. *BMJ open*. 2020;10(8):e039652.
- 332 [24] Quesada J, López-Pineda A, Gil-Guillén V, Arriero-Marín J, Gutiérrez F, Carratala-Munuera C. Incu-  
333 bation period of COVID-19: A systematic review and meta-analysis. *Revista Clínica Española (English*  
334 *Edition)*. 2021;221(2):109-17.
- 335 [25] Rai B, Shukla A, Dwivedi LK. Incubation period for COVID-19: a systematic review and meta-analysis.  
336 *Journal of Public Health*. 2021:1-8.
- 337 [26] Dhoub W, Maatoug J, Ayouni I, Zammit N, Ghammem R, Fredj SB, et al. The incubation period during  
338 the pandemic of COVID-19: a systematic review and meta-analysis. *Systematic Reviews*. 2021;10(1):1-  
339 14.
- 340 [27] Ijaz M, Brunner A, Sattar S, Nair RC, Johnson-Lussenburg C. Survival characteristics of airborne  
341 human coronavirus 229E. *Journal of General Virology*. 1985;66(12):2743-8.
- 342 [28] Morris DH, Yinda KC, Gamble A, Rossine FW, Huang Q, Bushmaker T, et al. Mechanistic theory  
343 predicts the effects of temperature and humidity on inactivation of SARS-CoV-2 and other enveloped  
344 viruses. *Elife*. 2021;10:e65902.
- 345 [29] Riddell S, Goldie S, Hill A, Eagles D, Drew TW. The effect of temperature on persistence of SARS-  
346 CoV-2 on common surfaces. *Virology journal*. 2020;17(1):1-7.
- 347 [30] Bulfone TC, Malekinejad M, Rutherford GW, Razani N. Outdoor transmission of SARS-CoV-2 and  
348 other respiratory viruses: a systematic review. *The Journal of infectious diseases*. 2021;223(4):550-61.

349

## APPENDIX A: THE MODEL IN DETAIL

350 In an SIR model, the equation for rate of change of disease prevalence is

$$\frac{dI}{dt} = \frac{\beta(t)S(t)I(t)}{N} - \gamma I(t), \quad (\text{A.1})$$

351 where  $\beta(t)$  is the time-dependent average number of effective contacts per person per unit  
352 time,  $\gamma$  is the recovery rate from the infectious state, and  $N$  is the size of the total population.  
353 Effective contacts are ones which would transmit disease if they involved an infectious person.  
354 As long as only a small fraction of the total population has become infected—as was the case  
355 in the US and most of the world throughout 2022— $S/N \approx 1$ , and the SIR model solution  
356 for the prevalence is

$$I(t) = I_0 e^{(\beta(t) - \gamma)t}, \quad (\text{A.2})$$

357 see e.g. [17]. The incidence, i.e. the rate of change of cumulative cases  $C(t)$ , is given by the  
358 first term on the right-hand side of Equation A.1 alone:

$$inc(t) = \frac{dC}{dt} = \frac{\beta S(t)I(t)}{N} \approx \beta(t)I(t), \quad (\text{A.3})$$

359 where the approximate equality holds when, again,  $S/N \approx 1$ . Substituting, we obtain

$$inc(t) = \beta(t)I_0 e^{(\beta(t) - \gamma)t} = inc_0 \left( \frac{\beta(t)}{\beta_0} \right) e^{(\beta(t) - \gamma)t} \quad (\text{A.4})$$

360 where

$$inc_0 = \beta_0 I_0. \quad (\text{A.5})$$

361 Since for an SIR model the instantaneous effective reproduction number is

$$R_{eff}(t) = \frac{\beta(t)}{\gamma} \frac{S(t)}{N} \quad (\text{A.6})$$

362 thus we can also write the incidence in terms of the reproduction number:

$$inc(t) = inc_0 \left( \frac{R_{eff}(t) - 1}{R_{eff,0} - 1} \right) e^{(R_{eff}(t) - 1)\gamma t} \quad (\text{A.7})$$

363 Taking the log of Equation A.4, we have

$$(\ln inc(t) - \ln inc_0) = (\ln \beta(t) - \ln \beta_0) + (\beta(t) - \gamma)t \quad (\text{A.8})$$

Considering now an infinitesimally small time interval,  $dt$ , this becomes

$$d \ln inc(t) = d \ln \beta(t) + (\beta(t) - \gamma) dt$$

364 or

$$\frac{d \ln inc(t)}{dt} = \frac{d \ln \beta(t)}{dt} + \beta(t) - \gamma \quad (\text{A.9})$$

365 Integrating with respect to  $t$ , we obtain, over a time interval  $[t_0, t]$ ,

$$(\ln inc(t) - \ln inc(t_0)) = (\ln \beta(t) - \ln \beta(t_0)) + \int_{t_0}^t \beta(t') dt' - \gamma(t - t_0) \quad (\text{A.10})$$

366 We can decompose  $\beta(t)$  into

$$\beta(t) = P_{trans}(t) cr(t), \quad (\text{A.11})$$

367 where  $cr(t)$  is the contact rate, while  $P_{trans}(t)$  is the transmission probability per contact.  
 368 Note that we can then express the reproduction number as:

$$R_{eff}(t) = \frac{P_{trans}(t)cr(t)}{\gamma} \quad (\text{A.12})$$

369 In general, both the contact rate and the transmission probability change over time, the  
 370 latter due to changes in the practice of non-pharmaceutical interventions (NPIs) such as  
 371 mask-wearing, as well as changes intrinsic to the disease, e.g. emergence of new variants.  
 372 Since widespread changes in NPIs and in the relative distribution of variants are usually  
 373 gradual, whereas contact patterns can change significantly from one day to the next (for  
 374 example between a weekday and the weekend, or as the result of a mass gathering event),  
 375 we expect  $P_{trans}(t)$  to generally vary more slowly than  $cr(t)$ . If  $P_{trans}$  can be considered  
 376 constant over the time interval  $[t_0, t]$ , then Equation A.10 becomes

$$(\ln inc(t) - \ln inc(t_0)) = (\ln cr(t) - \ln cr(t_0)) + P_{trans} \int_{t_0}^t cr(t')dt' - \gamma(t - t_0) \quad (\text{A.13})$$

377 Suppose we have time series data of incidence and contact rate reported with constant  
 378 time interval  $\delta t$ , so that  $cr_i$  and  $inc_i$  are the contacts per person and the total number of  
 379 new cases, respectively, occurring within the time interval  $t_{i-1} < t \leq t_i$ . We can then apply  
 380 Equation A.13 in discrete form to obtain the change in incidence between a time  $t_0$  and time  
 381  $t_n$  in terms of the contacts occurring during this time:

$$(\ln inc_n - \ln inc_0) = (\ln cr_n - \ln cr_0) + P_{trans} \sum_{i=1}^n cr_i - \gamma(t_n - t_0) \quad (\text{A.14})$$

382 In practice, disease incidence captured by surveillance will be subject to under-reporting,  
 383 i.e. the reported incidence is

$$inc = f_{rep} \cdot inc_{true} \quad (\text{A.15})$$

where  $inc_{true}$  is the true underlying incidence, and  $f_{rep}$  is the fraction of cases reported. If  
 $f_{rep}$  can be considered constant over the time interval  $[t_a, t_b]$ , then if we now replace the  
 reported incidence with the true incidence in Equation A.14, the left-hand side becomes

$$\ln \left( \frac{inc_b}{f_{rep}} \right) - \ln \left( \frac{inc_a}{f_{rep}} \right)$$

or

$$\ln \left( \frac{f_{rep} \cdot inc_b}{f_{rep} \cdot inc_a} \right),$$

384 thus  $f_{rep}$  cancels out and we recover the original equation. Therefore, when considering  
 385 time intervals over which the degree of under-reporting can be considered constant, the  
 386 relationship described by Equation A.13 is independent of under-reporting.

A simplification we have made thus far is to assume that there is no lag between contacts  
 and their effect on reported incidence. In reality, reporting delays and the incubation and  
 latent periods of the disease will together impose a distribution of delays between the time  
 that transmission occurs and the time that the resulting cases are captured by surveillance.  
 If cases reported at time  $t_i$  depend on contacts occurring between times  $t_{i-q}$  and  $t_{i-p}$ , with  
 $q > p$ , then we can account for this by replacing  $cr_i$  with an appropriately lagged version,

$$cr'_i = \alpha_{i-q}cr_{i-q} + \alpha_{i-q+1}cr_{i-q+1} + \dots + \alpha_{i-p}cr_{i-p}. \quad (\text{A.16})$$

## APPENDIX B: FITTING THE MODEL TO DATA

388 The CCI of a given region is the daily number of instances of two Cuebiq users occupying  
 389 the same 50ft x 50ft geohash grid cell within the same 5 minute interval, divided by the  
 390 total number of Cuebiq users within that region. From this, we want to estimate the rate of  
 391 encounters between Cuebiq users at distances  $\leq d_{trans}$ , where  $d_{trans}$  is the maximum distance  
 392 for potentially disease-transmitting contacts. Assuming an average movement speed  $v$ , the  
 393 time to pass through a  $d_{trans} \times d_{trans}$  cell is approximately  $d_{trans}/v$ . The proportionality con-  
 394 stant between CCI and the contact rate within distance  $d_{trans}$  between Cuebiq users is given  
 395 by the ratio of their associated space-time volumes. And, assuming that  $v$  is approximately  
 396 constant, the contact rate is linearly proportional to CCI:

$$cr_{Cuebiq} \approx \left(\frac{d_{trans}}{50ft}\right)^2 \left(\frac{d_{trans}/v}{5min}\right) CCI = f_{contact} CCI \quad (B.1)$$

397 Since only a fraction of the total population are Cuebiq users, the CCI only captures a  
 398 fraction of the total contacts experienced by a person per day. In order to estimate  $CCI_{100\%}$ ,  
 399 the hypothetical CCI which would be measured if the entire population were Cuebiq users,  
 400 we additionally obtain from Cuebiq the time series of total number of Cuebiq user devices  
 401 seen on day  $i$  across a given region,  $n_{Cuebiq_i}$ . Insofar as the Cuebiq users can be considered  
 402 a representative sample of the general population, we can then estimate  $CCI_{100\%}$  on day  $i$   
 403 across a given region by rescaling the CCI as follows:

$$CCI_{100\%_i} = CCI_i \cdot \frac{N_{pop}}{n_{Cuebiq_i}} \quad (B.2)$$

404 where  $N_{pop}$  is the population size of the region. Our estimate for the total contact rate is  
 405 then

$$cr = f_{contact} CCI_{100\%} \quad (B.3)$$

406 We can then write Equation 5 as

$$(\ln inc_n - \ln inc_0) = (\ln cr_n - \ln cr_0) + f_{contact} P_{trans} \sum_{i=1}^n CCI_{100\%_i} - \gamma(t_n - t_0) \quad (B.4)$$

407 where  $P_{CCI} = f_{contact} P_{trans}$  is the transmission probability per Cuebiq encounter.

408 We conduct our analysis at the state level, and thus aggregate incidence and Cuebiq data  
 409 (both of which are provided at the county level) accordingly. In order to calculate the  
 410 lagged version of the time series of  $CCI_{100\%_i}$  as per Equation A.16, we make the simplifying  
 411 assumption that  $q = p + 7$ . Given that the CCI is already computed as a 7-day rolling  
 412 average, we then only need to find  $p$  for each state. To do so, we perform a two-step  
 413 optimization. First, we select a time window  $t_j < t \leq t_k$  within the available data. We then  
 414 lag the time series of  $CCI_{100\%_i}$  by values of  $L = 0, 1, 2, \dots, 50$ . For each value of  $L$ , we use  
 415 the R optimization function `optim()` to find the value of  $P_{CCI}$  which produces the best fit  
 416 of Equation B.4 to the observed incidence over the time window, in the sense of minimizing  
 417 the negative log likelihood (NLL).

418 We take as  $t_j$  the day on which cumulative cases first reached or exceeded 10 in a given  
 419 state. We repeat the above fitting procedure with  $t_k = 1$  May 2020,  $t_k = 1$  June 2020, and  $t_k$   
 420  $= 1$  July 2020, each time computing a best-fit lag. We then take the average of these three  
 421 as the best-fit lag  $p$  for the given state. Using  $p$ , we compute the lagged CCI time series for  
 422 the state as per Equation A.16, which we then use to fit Equation B.4 to reported incidence.

423 We do so over successive 6-week time intervals, going from  $t_j$  until the end of 2020, thus  
424 obtaining a best-fit  $P_{CCI}$  for each interval.



FIGURE 1. The rescaled seven-day rolling average Cuebiq contact index,  $CCI_{100\%}$ , for four states during 2020 (black points). Also shown is the same data lagged by the best-fit mobility-incidence delay for the given state, obtained as described in Appendix B



FIGURE 2.  $P_{CCI}$ , the probability of an effective Cuebiq contact (see Equation 6) from the same rolling fits computed at six-week intervals (gray dotted lines) for Figure 3. Gray bands denote the 95% confidence interval for each interval.



FIGURE 3. Model incidence (blue curve segments; blue bands show 95% confidence interval) from Equation 5, using the maximum-likelihood fits of  $P_{CCI}$  (see Figure 2) and initial incidence  $inc_0$  to the time series of observed incidence (black dots) and  $CCI_{100\%}$  (see Figure 1) for four states. Fits are performed over successive six-week intervals (delimited by dotted vertical lines).



FIGURE 4. Top: Distribution across all 51 states of early (March 1 to April 30, 2020) average  $P_{CCI}$  (white; dashed line shows median = 0.0039), and rest-of-year (May 1 to December 31, 2020) average  $P_{CCI}$  (green, dotted line shows median = 0.0031). Bottom: distribution across all 51 states of best-fit lag between reported incidence and mobility (dashed line shows median = 19 days).



FIGURE 5. Early (1 March to 30 April)  $P_{CCI}$  versus average winter temperature by state (excluding DC). A moderate, statistically significant negative correlation exists,  $r(49) = -.57$ ,  $p = 2 \times 10^{-5}$ , i.e. lower temperatures tend to be associated with higher  $P_{CCI}$ .



FIGURE 6. Illustration of the application of our fitting methodology to short-range forecasting, using the state of Florida as an example. Forecasts are performed at different times (dashed vertical lines), each time using a fitting time window of the previous six weeks to estimate  $P_{CCI}$ . The forecast time horizon is equal to the mobility-transmission lag, which for Florida is estimated as 15 days. Also shown for comparison is 23 June (solid vertical line), the date on which widespread mask mandates started coming into effect in Florida, starting with Miami-Dade County.
